# Supplementary material for: Sensing of H2O2-induced oxidative stress by the UPF factor complex is crucial for activation of catalase-3 expression in Neurospora
Source: PLoS Genet. 2023 Oct 16;19(10):e1010985. doi: 10.1371/journal.pgen.1010985 (PMC10578600; doi:10.1371/journal.pgen.1010985)
Supplement: S1 Table — (XLSX) [file pgen.1010985.s011.xlsx]

## Sheet: Sheet1
	S1 Table. GO Category analysis in the upf-1KO strain.
	Category	ID	Term	observed_gene_count	background_gene_ count	FDR	BGRatio	GeneRatio	Foldenrichment	log10FDR	Gene Symols	Gene Names
	BP	GO:0055114	Oxidation-reduction process	129	731	0.00014	0.0684137	0.126347	1.84681	-3.85387	NCU00148,NCU00206,NCU00207,NCU00355,NCU00552,NCU00643,NCU00780,NCU00837,NCU00973,NCU00987,NCU01078,NCU01106,NCU01107,NCU01233,NCU01861,NCU01906,NCU02031,NCU02042,NCU02126,NCU02201,NCU02476,NCU02906,NCU02926,NCU02927,NCU02930,NCU02936,NCU03049,NCU03076,NCU03195,NCU03813,NCU03913,NCU04078,NCU04231,NCU04298,NCU04343,NCU04474,NCU04510,NCU04539,NCU04591,NCU04771,NCU04823,NCU04857,NCU04874,NCU05000,NCU…	short chain dehydrogenase/reductase(NCU00148),cellobiose dehydrogenase-1(NCU00206),oxidoreductase(NCU00207),catalase-3(NCU00355), albino-1(NCU00552),L-arabinitol 4-dehydrogenase(NCU00643),D-lactate dehydrogenase(NCU00780), 6-phosphogluconate dehydrogenase(NCU00837), hypothetical protein(NCU00973),pisatin demethylase(NCU00987),D-mandelate dehydrogenase(NCU01078),L-amino acid oxidase(NCU01106), sho…
	BP	GO:0005975	Carbohydrate metabolic process	62	306	0.0078	0.0286383	0.0607248	2.12041	-2.10791	NCU00086,NCU00130,NCU00642,NCU00643,NCU00710,NCU00810,NCU00837,NCU01162,NCU01233,NCU01906,NCU02032,NCU02322,NCU02343,NCU02369,NCU02855,NCU03742,NCU04168,NCU04431,NCU04510,NCU04623,NCU04854,NCU04883,NCU04997,NCU05057,NCU05151,NCU05212,NCU05317,NCU05882,NCU05955,NCU05969,NCU06020,NCU06123,NCU06326,NCU06381,NCU06961,NCU07064,NCU07080,NCU07143,NCU07326,NCU07340,NCU07626,NCU07703,NCU08127,NCU08231,NCU…	glycosyl hydrolase(NCU00086),glycosylhydrolase family 1-1(NCU00130),glycosylhydrolase family 35-1(NCU00642),L-arabinitol 4-dehydrogenase(NCU00643),acetyl xylan esterase(NCU00710),glycosylhydrolase family 2-3(NCU00810), 6-phosphogluconate dehydrogenase(NCU00837),glycolipid-anchored surface protein 5(NCU01162),aldose reductase(NCU01233),GCY protein(NCU01906),glycosylhydrolase family 76-1(NCU02032),…
	BP	GO:0016052	Carbohydrate catabolic process	38	152	0.0078	0.0142256	0.0372184	2.61631	-2.10791	NCU11405,NCU04623,NCU08856,NCU01233,NCU02032,NCU04997,NCU05057,NCU04510,NCU00086,NCU04883,NCU09281,NCU05969,NCU05955,NCU09652,NCU09170,NCU04854,NCU02343,NCU08127,NCU02369,NCU05882,NCU07064,NCU06381,NCU07340,NCU06961,NCU07626,NCU00837,NCU09805,NCU02855,NCU00810,NCU00710,NCU01906,NCU00643,NCU00642,NCU09491,NCU09042,NCU17088,NCU06326,NCU10045	glycosyl hydrolase(NCU00086),glycosylhydrolase family 35-1(NCU00642),L-arabinitol 4-dehydrogenase(NCU00643),acetyl xylan esterase(NCU00710),glycosylhydrolase family 2-3(NCU00810),6-phosphogluconate dehydrogenase(NCU00837), aldose reductase(NCU01233),GCY protein(NCU01906),glycosylhydrolase family 76-1(NCU02032),alpha-L-arabinofuranosidase 2(NCU02343),glycosylhydrolase family 28-1(NCU02369),glycosy…
	BP	GO:0000272	Polysaccharide catabolic process	24	82	0.0358	0.00767431	0.0235064	3.06299	-1.44612	NCU11405,NCU04623,NCU04997,NCU05057,NCU04883,NCU05969,NCU05955,NCU09652,NCU09170,NCU04854,NCU02343,NCU02369,NCU05882,NCU06381,NCU07340,NCU06961,NCU02855,NCU00710,NCU00642,NCU09491,NCU09042,NCU17088,NCU06326,NCU10045	glycosylhydrolase family 35-1(NCU00642),acetyl xylan esterase(NCU00710),alpha-L-arabinofuranosidase 2(NCU02343),glycosylhydrolase family 28-1(NCU02369),glycosylhydrolase family 11-1(NCU02855),glycosylhydrolase family 35-2(NCU04623), glycosylhydrolase family 7-2(NCU04854),glycosyl hydrolase family 18-4(NCU04883),glycosylhydrolase family 10-3(NCU04997),glycosylhydrolase family 7-1(NCU05057),cellula…
